# Supplementary material for: Designing antiferromagnetically coupled mono-, di- and tri-bridged copper(ii)-based catecholase models by varying the ‘Auxiliary Parts’ of the ligand and anionic co-ligand
Source: Royal Society of Chemistry journal article supplement (doi:10.1039/c9ce01115c), 2019-01-01
Supplement: c9ce01115c1.pdf [file c9ce01115c1.pdf]

**Electronic Supplementary Information**

**Designing of antiferromagnetically coupled mono-, di- and tri- bridged copper(II) based catecholase models by varying “Auxiliary Part” of ligand and anionic co-ligand**

Sanchari Dasgupta,<sup>a</sup> Prateeti Chakraborty,<sup>b</sup> Priyanka Kundu,<sup>a</sup> Hulya Kara,<sup>c</sup> Gabriel Aullón,<sup>d</sup> Ennio Zangrando,<sup>\*e</sup> and Debasis Das<sup>\*a</sup>

<sup>a</sup> Department of Chemistry, University of Calcutta, 92 A. P. C. Road, Kolkata 700009, India.  
E-mail: dasdebasis2001@yahoo.com

<sup>b</sup> Department of Chemistry, Bangabasi College, 19 Rajkumar Chakraborty Sarani, Kolkata 700009, India

<sup>c</sup> Department of Physics, Faculty of Science and Art, Balikesir University, 10145 Balikesir, Turkey

<sup>d</sup> Departament de Química Inorgànica i Orgànica (Secció de Química Inorgànica) and Institut de Química Teòrica i Computacional, Universitat de Barcelona, 08028 Barcelona, Spain

<sup>e</sup> Department of Chemical and Pharmaceutical Sciences, University of Trieste, Via L. Giorgieri 1, 34127 Trieste, Italy

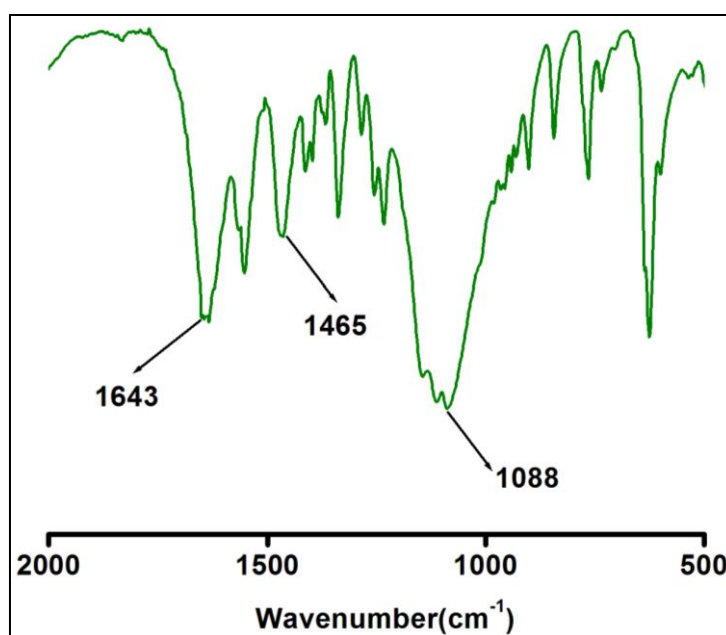

(a)

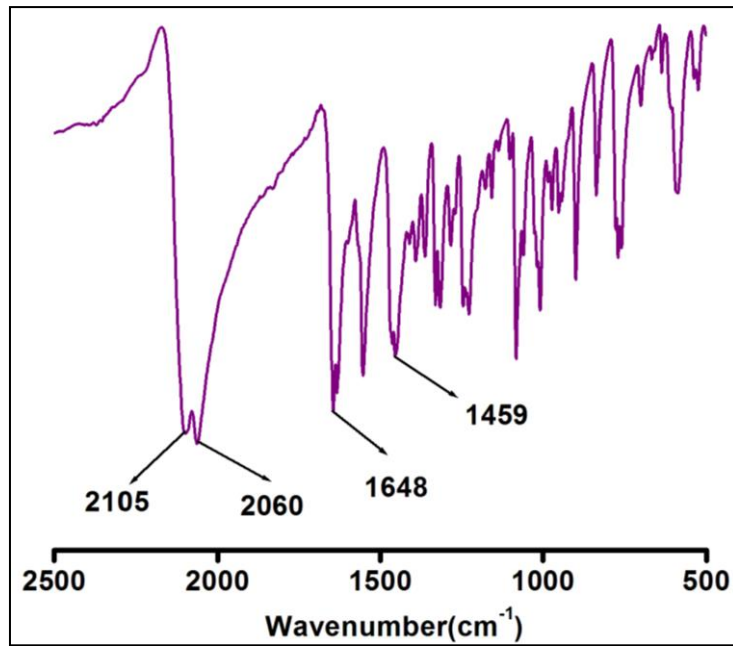

(b)

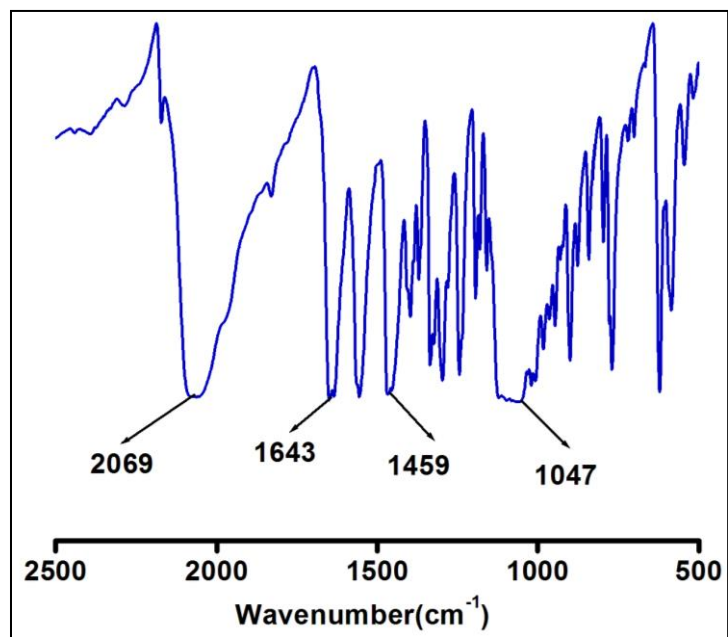

(c)

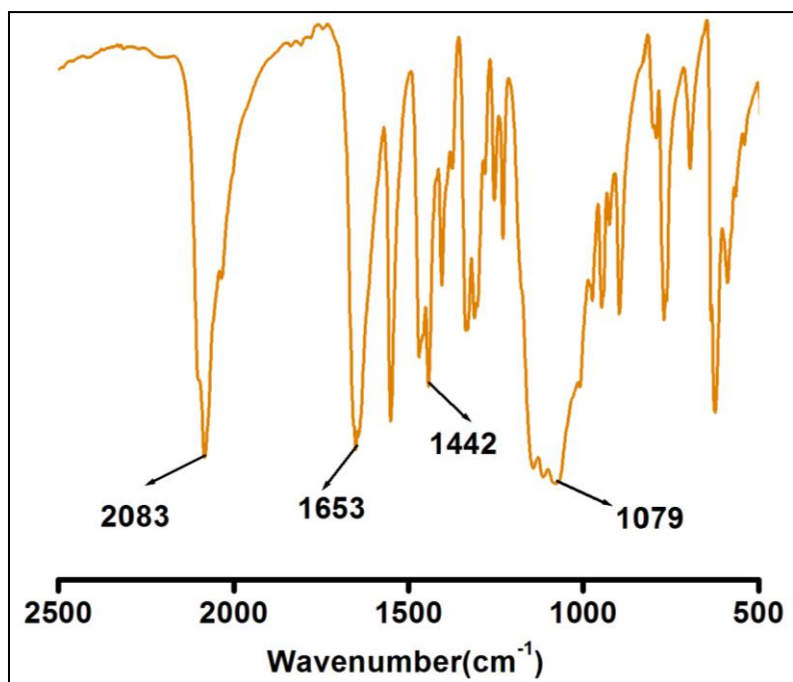

(d)

**Fig. S1** FT-IR spectrum of (a) complex 1, (b) complex 2, (c) complex 3 and (d) complex 4.

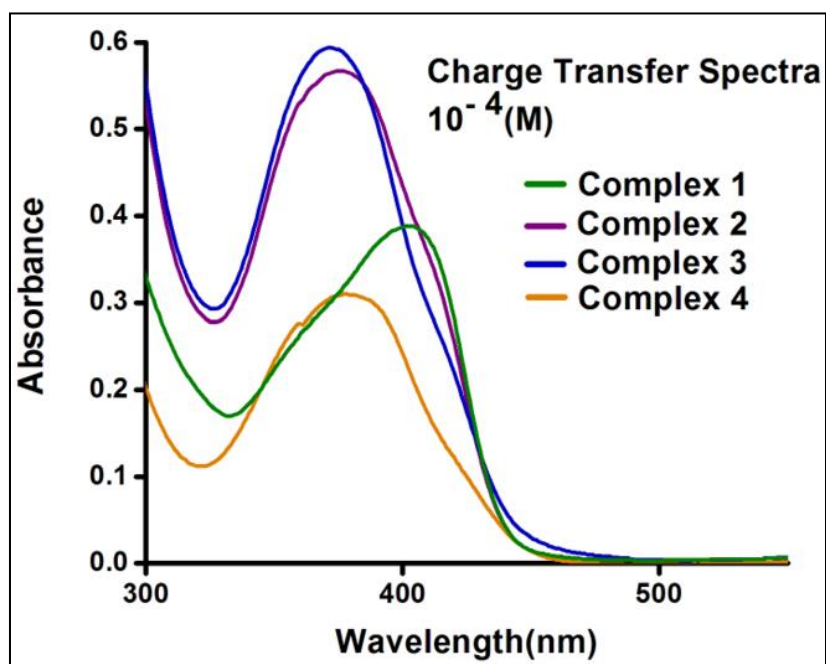

(a)

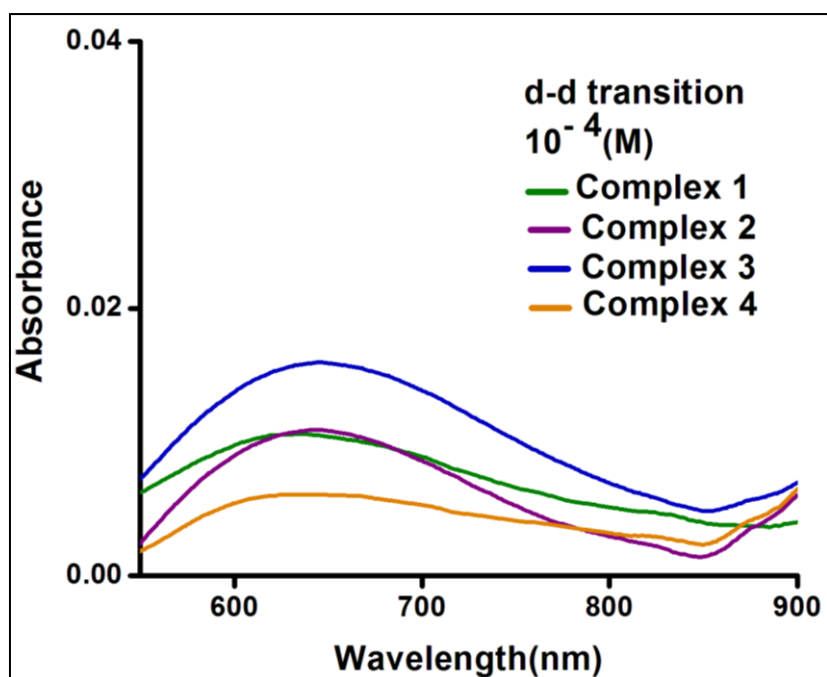

(b)

**Fig. S2** (a) Charge transfer Spectra and (b) d-d transition of complexes in DMSO medium.

**Table S1.** Selected bond lengths (Å) and angles (°) for Complex 1

|                 |            |                  |            |
|-----------------|------------|------------------|------------|
| Cu(1)-O(1)      | 1.967(3)   | Cu(2)-O(1)       | 1.947(3)   |
| Cu(1)-N(1)      | 1.920(4)   | Cu(2)-N(3)       | 1.906(4)   |
| Cu(1)-N(2)      | 2.018(4)   | Cu(2)-N(4)       | 2.017(4)   |
| Cu(1)-O(2)      | 1.885(3)   | Cu(2)-O(2)       | 1.886(3)   |
| Cu(1)-O(1w)     | 2.549(4)   | Cu(2)-O(10)      | 2.584(4)   |
| Cu(1)-O(7)      | 2.827(4)   | Cu(1)-Cu(2)      | 2.9634(9)  |
|                 |            |                  |            |
| O(2)-Cu(1)-N(1) | 168.68(14) | O(2)-Cu(2)-O(1)  | 79.05(13)  |
| O(2)-Cu(1)-O(1) | 78.58(12)  | N(3)-Cu(2)-O(1)  | 91.34(14)  |
| N(1)-Cu(1)-O(1) | 90.68(13)  | O(2)-Cu(2)-N(4)  | 102.83(15) |
| O(2)-Cu(1)-N(2) | 103.61(15) | N(3)-Cu(2)-N(4)  | 86.75(16)  |
| N(1)-Cu(1)-N(2) | 86.78(16)  | O(1)-Cu(2)-N(4)  | 178.02(14) |
| O(1)-Cu(1)-N(2) | 174.62(14) | Cu(2)-O(1)-Cu(1) | 98.42(12)  |
| O(2)-Cu(2)-N(3) | 170.25(15) | Cu(1)-O(2)-Cu(2) | 103.61(14) |

**Table S2.** Selected bond lengths (Å) and angles (°) for Complex 4

|            |          |             |            |
|------------|----------|-------------|------------|
| Cu(1)-O(1) | 1.967(4) | Cu(2)-O(1)  | 1.954(4)   |
| Cu(1)-N(1) | 1.927(5) | Cu(2)-N(3)  | 1.931(5)   |
| Cu(1)-N(2) | 2.014(5) | Cu(2)-N(4)  | 2.006(5)   |
| Cu(1)-N(5) | 1.932(5) | Cu(2)-N(5)  | 1.953(5)   |
| Cu(1)-O(2) | 2.564(5) | Cu(2)-O(3)  | 2.460(5)   |
| Cu(1)-O(7) | 2.726(5) | Cu(1)-Cu(2) | 2.9746(13) |

|                 |           |                  |            |
|-----------------|-----------|------------------|------------|
| N(1)-Cu(1)-N(5) | 169.4(2)  | N(3)-Cu(2)-O(1)  | 91.33(18)  |
| N(1)-Cu(1)-O(1) | 91.44(19) | N(5)-Cu(2)-O(1)  | 80.46(19)  |
| N(5)-Cu(1)-O(1) | 80.63(19) | N(3)-Cu(2)-N(4)  | 86.2(2)    |
| N(1)-Cu(1)-N(2) | 86.2(2)   | N(5)-Cu(2)-N(4)  | 101.9(2)   |
| N(5)-Cu(1)-N(2) | 102.1(2)  | O(1)-Cu(2)-N(4)  | 177.49(19) |
| O(1)-Cu(1)-N(2) | 176.2(2)  | Cu(1)-O(1)-Cu(2) | 98.68(17)  |
| N(3)-Cu(2)-N(5) | 167.7(2)  | Cu(1)-N(5)-Cu(2) | 99.9(2)    |

**Table S3.** Selected bond lengths (Å) and angles (°) for Complex 2

|                 |           |                  |            |
|-----------------|-----------|------------------|------------|
| Cu(1)-O(1)      | 1.981(3)  | Cu(2)-O(1)       | 1.977(3)   |
| Cu(1)-N(1)      | 1.953(4)  | Cu(2)-N(3)       | 1.944(4)   |
| Cu(1)-N(2)      | 2.038(5)  | Cu(2)-N(4)       | 2.057(5)   |
| Cu(1)-N(5)      | 1.934(6)  | Cu(2)-N(7)       | 1.919(5)   |
| Cu(1)-N(6)      | 2.252(5)  | Cu(2)-S(2)'      | 2.6634(16) |
|                 |           | Cu(1)-Cu(2)      | 3.3628(2)  |
|                 |           |                  |            |
| N(5)-Cu(1)-N(1) | 176.3(2)  | N(7)-Cu(2)-N(3)  | 175.5(2)   |
| N(5)-Cu(1)-O(1) | 91.09(18) | N(7)-Cu(2)-O(1)  | 91.84(16)  |
| N(1)-Cu(1)-O(1) | 87.59(15) | N(3)-Cu(2)-O(1)  | 87.46(16)  |
| N(5)-Cu(1)-N(2) | 95.9(2)   | N(7)-Cu(2)-N(4)  | 95.2(2)    |
| N(1)-Cu(1)-N(2) | 84.4(2)   | N(3)-Cu(2)-N(4)  | 84.12(19)  |
| O(1)-Cu(1)-N(2) | 162.4(2)  | O(1)-Cu(2)-N(4)  | 161.27(19) |
| N(5)-Cu(1)-N(6) | 93.8(2)   | N(7)-Cu(2)-S(2)' | 88.95(16)  |
| N(1)-Cu(1)-N(6) | 89.9(2)   | N(3)-Cu(2)-S(2)' | 95.48(14)  |
| O(1)-Cu(1)-N(6) | 97.1(2)   | O(1)-Cu(2)-S(2)' | 92.37(11)  |
| N(2)-Cu(1)-N(6) | 98.5(2)   | N(4)-Cu(2)-S(2)' | 105.05(17) |
|                 |           | Cu(2)-O(1)-Cu(1) | 116.36(15) |

S(2)' at -x+1/2,-y+1/2,z+1/2.

**Table S4.** Selected bond lengths (Å) and angles (°) for Complex 3

|              |           |              |            |
|--------------|-----------|--------------|------------|
| Cu-N(1)      | 1.924(4)  | Cu-O(1)      | 1.978(3)   |
| Cu-N(2)      | 2.041(5)  | Cu-O(2)      | 2.652(5)   |
| Cu-N(3)      | 1.907(4)  | Cu-Cu'       | 3.225(1)   |
|              |           |              |            |
| N(3)-Cu-N(1) | 171.4(2)  | O(1)-Cu-N(2) | 163.73(15) |
| N(3)-Cu-O(1) | 91.10(16) | O(1)-Cu-O(2) | 97.70(14)  |
| N(1)-Cu-O(1) | 89.02(15) | O(2)-Cu-N(1) | 86.82(18)  |
| N(3)-Cu-N(2) | 97.54(19) | O(2)-Cu-N(2) | 96.85(19)  |
| N(1)-Cu-N(2) | 84.49(19) | O(2)-Cu-N(3) | 84.6(2)    |
|              |           | Cu'-O(1)-Cu  | 109.2(2)   |

Symmetry codes (') -x,y,-z+3/2.

**Table S5.** Relative Gibbs free energies in methanol solution for compounds involved in the reaction shown in the Schemes 1 and 2 (for optimization in gas phase, relative Gibbs free energies after solvent effects appear in parenthesis). All energies are in kcal/mol.

| Compds                                                                                                                              | X in L <sup>X</sup> |         |       |         |       |         |
|-------------------------------------------------------------------------------------------------------------------------------------|---------------------|---------|-------|---------|-------|---------|
|                                                                                                                                     | tBu                 |         | Me    |         | Cl    |         |
| [Cu <sub>2</sub> (κ <sup>5</sup> -L)(μ-OH)] <sup>2+</sup> ( <b>A<sup>E</sup></b> )                                                  | 0.0                 | (0.0)   | 0.0   | (0.0)   | 0.0   | (0.0)   |
| [Cu <sub>2</sub> (κ <sup>5</sup> -L)(μ-OH)(ClO <sub>4</sub> )] <sup>+</sup> ( <b>A<sup>X</sup></b> )                                | +7.6                | (+8.7)  | +8.2  | (+8.7)  | +5.9  | (+8.3)  |
| [Cu <sub>2</sub> (κ <sup>5</sup> -L)(μ-OH)(ClO <sub>4</sub> ) <sub>2</sub> ] <sup>+</sup> ( <b>A<sup>Y</sup></b> )                  | +15.1               | (+15.7) | +15.5 | (+15.3) | +13.5 | (+15.1) |
| [Cu <sub>2</sub> (κ <sup>5</sup> -L)(μ-OH)(ClO <sub>4</sub> )(H <sub>2</sub> O)] <sup>+</sup> ( <b>A<sup>W</sup></b> )              | +8.8                | (+17.1) | +9.5  | (+17.0) | +7.6  | (+16.4) |
| [Cu <sub>2</sub> (κ <sup>5</sup> -L)(μ-N <sub>3</sub> )] <sup>2+</sup> ( <b>B<sup>E</sup></b> )                                     | 0.0                 | (0.0)   | 0.0   | (0.0)   | 0.0   | (0.0)   |
| [Cu <sub>2</sub> (κ <sup>5</sup> -L)(μ-N <sub>3</sub> )(ClO <sub>4</sub> )] <sup>+</sup> ( <b>B<sup>X</sup></b> )                   | +6.7                | (+7.3)  | +8.9  | (+7.0)  | +7.6  | (+6.8)  |
| [Cu <sub>2</sub> (κ <sup>5</sup> -L)(μ-N <sub>3</sub> )(ClO <sub>4</sub> ) <sub>2</sub> ] <sup>+</sup> ( <b>B<sup>Y</sup></b> )     | +14.9               | (+15.0) | +17.4 | (+14.7) | +15.2 | (+14.0) |
| [Cu <sub>2</sub> (κ <sup>5</sup> -L)(μ-N <sub>3</sub> )(ClO <sub>4</sub> )(H <sub>2</sub> O)] <sup>+</sup> ( <b>B<sup>W</sup></b> ) | +11.8               | (+16.5) | +11.3 | (+16.0) | +8.2  | (+15.5) |
| [Cu <sub>2</sub> (κ <sup>5</sup> -L)(μ-NCS)] <sup>2+</sup> ( <b>C<sup>E</sup></b> )                                                 | +8.3                | (+11.7) | +8.0  | (+11.5) | +8.9  | (+11.8) |
| [Cu <sub>2</sub> (κ <sup>5</sup> -L)(μ-NCS)] <sup>2+</sup> ( <b>C<sup>E</sup></b> )                                                 | 0.0                 | (0.0)   | 0.0   | (0.0)   | 0.0   | (0.0)   |
| [Cu <sub>2</sub> (κ <sup>5</sup> -L)(NCS) <sub>2</sub> ] <sup>+</sup> ( <b>C<sup>N</sup></b> )                                      | -1.3                | (-6.4)  | -0.8  | (-6.8)  | -1.4  | (-7.3)  |
| [Cu <sub>2</sub> (κ <sup>5</sup> -L)(NCS) <sub>2</sub> (ClO <sub>4</sub> ) <sub>2</sub> ] <sup>-</sup> ( <b>D<sup>Cl</sup></b> )    | +18.3               | (+13.4) | +17.5 | (+13.0) | +14.4 | (+12.1) |
| [Cu <sub>2</sub> (κ <sup>5</sup> -L)(NCS) <sub>2</sub> (κN-NCS) <sub>2</sub> ] <sup>-</sup> ( <b>D<sup>N</sup></b> )                | +19.8               | (-0.3)  | +19.0 | (-1.3)  | +18.4 | (-2.1)  |
| [Cu <sub>2</sub> (κ <sup>5</sup> -L)(NCS) <sub>2</sub> (κS-SCN) <sub>2</sub> ] <sup>-</sup> ( <b>D<sup>S</sup></b> )                | +15.8               | (+2.2)  | +15.2 | (+1.9)  | +14.4 | (+0.8)  |

**Table S6.** Main geometric parameters for the optimized molecular structures in methanol solution (optimizations in gas phase are shown in parenthesis). Distances in angstroms, angles in degrees.

| Compounds                                                                                            | tBu  |        | Me   |        | Cl   |        |
|------------------------------------------------------------------------------------------------------|------|--------|------|--------|------|--------|
| [Cu <sub>2</sub> (κ <sup>5</sup> -L)(μ-OH)] <sup>2+</sup> ( <b>A<sup>E</sup></b> )                   |      |        |      |        |      |        |
| Cu...Cu                                                                                              | 3.01 | (3.06) | 3.01 | (3.06) | 3.01 | (3.06) |
| Cu-O <sub>Ar</sub>                                                                                   | 2.00 | (1.99) | 2.00 | (2.00) | 2.01 | (2.00) |
| Cu-OH                                                                                                | 1.98 | (1.94) | 1.98 | (1.94) | 1.98 | (1.94) |
| Cu-N <sub>Im</sub>                                                                                   | 1.97 | (1.95) | 1.97 | (1.95) | 1.98 | (1.95) |
| Cu-N <sub>Am</sub>                                                                                   | 2.08 | (2.07) | 2.08 | (2.06) | 2.08 | (2.06) |
| θ                                                                                                    | 178  | (180)  | 175  | (180)  | 171  | (180)  |
| [Cu <sub>2</sub> (κ <sup>5</sup> -L)(μ-OH)(ClO <sub>4</sub> )] <sup>+</sup> ( <b>A<sup>X</sup></b> ) |      |        |      |        |      |        |
| Cu...Cu                                                                                              | 3.01 | (2.97) | 3.01 | (2.97) | 3.01 | (2.97) |
| Cu-O <sub>Ar</sub>                                                                                   | 2.00 | (2.00) | 2.01 | (2.01) | 2.01 | (2.01) |
| Cu-OH                                                                                                | 1.99 | (1.96) | 1.98 | (1.96) | 1.98 | (1.96) |
| Cu-N <sub>Im</sub>                                                                                   | 1.98 | (1.97) | 1.98 | (1.97) | 1.98 | (1.97) |
| Cu-N <sub>Am</sub>                                                                                   | 2.09 | (2.09) | 2.08 | (2.09) | 2.08 | (2.08) |

|                                                                                                             |      |        |      |        |      |        |
|-------------------------------------------------------------------------------------------------------------|------|--------|------|--------|------|--------|
| $\text{Cu}\cdots\text{O}_{Cl}$                                                                              | 3.27 | (2.37) | 3.27 | (2.37) | 3.32 | (2.36) |
|                                                                                                             | 3.31 | (2.39) | 3.33 | (2.38) | 3.32 | (2.37) |
| $\text{O}(\text{H})\cdots\text{O}_{Cl}$                                                                     | 3.11 | (2.92) | 3.09 | (2.92) | 3.10 | (2.92) |
| $\theta$                                                                                                    | 179  | (161)  | 179  | (161)  | 179  | (160)  |
| <b>[Cu<sub>2</sub>(κ<sup>5</sup>-L)(μ-OH)(ClO<sub>4</sub>)<sub>2</sub>] (A<sup>Y</sup>)</b>                 |      |        |      |        |      |        |
| $\text{Cu}\cdots\text{Cu}$                                                                                  | 3.01 | (2.94) | 3.01 | (2.94) | 3.01 | (2.94) |
| $\text{Cu}-\text{O}_{Ar}$                                                                                   | 2.01 | (1.99) | 2.00 | (1.99) | 2.01 | (1.99) |
| $\text{Cu}-\text{OH}$                                                                                       | 1.98 | (1.96) | 1.98 | (1.96) | 1.98 | (1.96) |
| $\text{Cu}-\text{N}_{Im}$                                                                                   | 1.98 | (1.98) | 1.98 | (1.98) | 1.98 | (1.98) |
| $\text{Cu}-\text{N}_{Am}$                                                                                   | 2.09 | (2.08) | 2.09 | (2.08) | 2.08 | (2.08) |
| $\text{Cu}\cdots\text{O}_{Cl}$                                                                              | 3.99 | (2.72) | 3.59 | (2.71) | 3.34 | (2.69) |
|                                                                                                             | 4.45 | (2.79) | 3.64 | (2.79) | 3.76 | (2.76) |
| $\text{O}(\text{H})\cdots\text{O}_{Cl}$                                                                     | 3.07 | (2.89) | 3.05 | (2.89) | 3.07 | (2.88) |
| $\text{Cu}\cdots\text{O}_{Cl}$                                                                              | 3.23 | (2.45) | 3.25 | (2.44) | 3.23 | (2.44) |
|                                                                                                             | 3.27 | (2.50) | 3.26 | (2.49) | 3.27 | (2.48) |
| $\theta$                                                                                                    | 180  | (174)  | 180  | (174)  | 179  | (174)  |
| <b>[Cu<sub>2</sub>(κ<sup>5</sup>-L)(μ-OH)(ClO<sub>4</sub>)(H<sub>2</sub>O)]<sup>+</sup> (A<sup>W</sup>)</b> |      |        |      |        |      |        |
| $\text{Cu}\cdots\text{Cu}$                                                                                  | 3.04 | (2.99) | 3.04 | (2.99) | 3.04 | (3.00) |
| $\text{Cu}-\text{O}_{Ar}$                                                                                   | 2.01 | (2.00) | 2.02 | (2.00) | 2.02 | (2.01) |
| $\text{Cu}-\text{OH}$                                                                                       | 2.00 | (1.98) | 1.99 | (1.98) | 1.99 | (1.98) |
| $\text{Cu}-\text{N}_{Im}$                                                                                   | 1.98 | (1.97) | 1.98 | (1.97) | 1.98 | (1.97) |
| $\text{Cu}-\text{N}_{Am}$                                                                                   | 2.09 | (2.08) | 2.09 | (2.08) | 2.08 | (2.08) |
| $\text{Cu}\cdots\text{O}_{Cl}$                                                                              | 3.34 | (2.37) | 3.33 | (2.37) | 3.32 | (2.36) |
|                                                                                                             | 3.54 | (2.41) | 3.52 | (2.41) | 3.50 | (2.40) |
| $\text{O}(\text{H})\cdots\text{O}_{Cl}$                                                                     | 3.03 | (2.86) | 3.03 | (2.86) | 3.02 | (2.86) |
| $\text{O}_{OH}\cdots(\text{H})\text{O}_W$                                                                   | 3.04 | (2.78) | 2.74 | (2.78) | 2.74 | (2.78) |
| $\theta$                                                                                                    | 178  | (163)  | 177  | (163)  | 177  | (162)  |
| <b>[Cu<sub>2</sub>(κ<sup>5</sup>-L)(μ-N<sub>3</sub>)]<sup>2+</sup> (B<sup>E</sup>)</b>                      |      |        |      |        |      |        |
| $\text{Cu}\cdots\text{Cu}$                                                                                  | 3.12 | (3.11) | 3.12 | (3.11) | 3.12 | (3.11) |
| $\text{Cu}-\text{O}_{Ar}$                                                                                   | 2.02 | (2.01) | 2.02 | (2.01) | 2.02 | (2.02) |
| $\text{Cu}-\text{N}_3$                                                                                      | 2.05 | (2.00) | 2.05 | (2.00) | 2.05 | (2.00) |
| $\text{Cu}-\text{N}_{Im}$                                                                                   | 1.97 | (1.95) | 1.97 | (1.95) | 1.97 | (1.95) |
| $\text{Cu}-\text{N}_{Am}$                                                                                   | 2.08 | (2.08) | 2.08 | (2.08) | 2.08 | (2.08) |
| $\theta$                                                                                                    | 176  | (177)  | 177  | (177)  | 177  | (177)  |
| <b>[Cu<sub>2</sub>(κ<sup>5</sup>-L)(μ-N<sub>3</sub>)(ClO<sub>4</sub>)]<sup>+</sup> (B<sup>X</sup>)</b>      |      |        |      |        |      |        |
| $\text{Cu}\cdots\text{Cu}$                                                                                  | 3.13 | (3.04) | 3.12 | (3.04) | 3.12 | (3.04) |
| $\text{Cu}-\text{O}_{Ar}$                                                                                   | 2.03 | (2.03) | 2.03 | (2.03) | 2.03 | (2.03) |
| $\text{Cu}-\text{N}_3$                                                                                      | 2.05 | (2.02) | 2.04 | (2.02) | 2.05 | (2.02) |

|                                                                                                                                               |      |        |      |        |      |        |
|-----------------------------------------------------------------------------------------------------------------------------------------------|------|--------|------|--------|------|--------|
| Cu-N <sub>Im</sub>                                                                                                                            | 1.96 | (1.97) | 1.97 | (1.97) | 1.97 | (1.97) |
| Cu-N <sub>Am</sub>                                                                                                                            | 2.09 | (2.09) | 2.09 | (2.09) | 2.08 | (2.09) |
| Cu...O <sub>Cl</sub>                                                                                                                          | 3.18 | (2.30) | 3.16 | (2.29) | 3.20 | (2.29) |
|                                                                                                                                               | 3.27 | (2.30) | 3.20 | (2.29) | 3.40 | (2.29) |
| $\theta$                                                                                                                                      | 172° | (154)  | 179° | (154)  | 175° | (154)  |
| <b>[Cu<sub>2</sub>(<math>\kappa^5</math>-L)(<math>\mu</math>-N<sub>3</sub>)(ClO<sub>4</sub>)<sub>2</sub>] (B<sup>Y</sup>)</b>                 |      |        |      |        |      |        |
| Cu...Cu                                                                                                                                       | 3.12 | (3.03) | 3.12 | (3.03) | 3.11 | (3.03) |
| Cu-O <sub>Ar</sub>                                                                                                                            | 2.02 | (2.01) | 2.03 | (2.01) | 2.03 | (2.02) |
| Cu-N <sub>3</sub>                                                                                                                             | 2.05 | (2.01) | 2.05 | (2.01) | 2.04 | (2.01) |
| Cu-N <sub>Im</sub>                                                                                                                            | 1.97 | (1.98) | 1.97 | (1.98) | 1.97 | (1.98) |
| Cu-N <sub>Am</sub>                                                                                                                            | 2.09 | (2.10) | 2.09 | (2.10) | 2.08 | (2.10) |
| Cu...O <sub>Cl</sub>                                                                                                                          | 3.23 | (2.48) | 3.25 | (2.47) | 3.40 | (2.47) |
|                                                                                                                                               | 3.39 | (2.49) | 3.35 | (2.49) | 3.42 | (2.48) |
| Cu...O <sub>Cl</sub>                                                                                                                          | 3.17 | (2.50) | 3.16 | (2.50) | 3.20 | (2.49) |
|                                                                                                                                               | 3.27 | (2.52) | 3.28 | (2.52) | 3.22 | (2.50) |
| $\theta$                                                                                                                                      | 178° | (180)  | 180° | (180)  | 180° | (180)  |
| <b>[Cu<sub>2</sub>(<math>\kappa^5</math>-L)(<math>\mu</math>-N<sub>3</sub>)(ClO<sub>4</sub>)(H<sub>2</sub>O)]<sup>+</sup> (B<sup>W</sup>)</b> |      |        |      |        |      |        |
| Cu...Cu                                                                                                                                       | 3.11 | (3.05) | 3.11 | (3.05) | 3.11 | (3.05) |
| Cu-O <sub>Ar</sub>                                                                                                                            | 2.02 | (2.04) | 2.02 | (2.04) | 2.03 | (2.05) |
| Cu-N <sub>3</sub>                                                                                                                             | 2.05 | (2.01) | 2.05 | (2.01) | 2.05 | (2.01) |
| Cu-N <sub>Im</sub>                                                                                                                            | 1.97 | (1.97) | 1.97 | (1.97) | 1.97 | (1.97) |
| Cu-N <sub>Am</sub>                                                                                                                            | 2.08 | (2.10) | 2.08 | (2.10) | 2.08 | (2.10) |
| Cu...O <sub>Cl</sub>                                                                                                                          | 3.24 | (2.28) | 3.25 | (2.27) | 3.20 | (2.27) |
|                                                                                                                                               | 3.34 | (2.40) | 3.34 | (2.41) | 3.26 | (2.41) |
| Cu...O <sub>W</sub>                                                                                                                           | 3.28 | (2.70) | 3.22 | (2.70) | 3.28 | (2.68) |
| $\theta$                                                                                                                                      | 176  | (156)  | 176  | (156)  | 176  | (156)  |
| <b>[Cu<sub>2</sub>(<math>\kappa^5</math>-L)(<math>\mu</math>-NCS)]<sup>2+</sup> (C<sup>E</sup>)</b>                                           |      |        |      |        |      |        |
| Cu...Cu                                                                                                                                       | 3.10 | (3.08) | 3.07 | (3.08) | 3.07 | (3.07) |
| Cu-O <sub>Ar</sub>                                                                                                                            | 2.01 | (2.00) | 2.00 | (2.00) | 2.01 | (2.01) |
| Cu-NCS                                                                                                                                        | 2.10 | (2.03) | 2.10 | (2.03) | 2.09 | (2.02) |
| Cu-N <sub>Im</sub>                                                                                                                            | 1.97 | (1.96) | 1.97 | (1.96) | 1.97 | (1.96) |
| Cu-N <sub>Am</sub>                                                                                                                            | 2.08 | (2.08) | 2.08 | (2.08) | 2.08 | (2.08) |
| $\theta$                                                                                                                                      | 172  | (173)  | 166  | (174)  | 166  | (174)  |
| <b>[Cu<sub>2</sub>(<math>\kappa^5</math>-L)(NCS)<sub>2</sub>]<sup>+</sup> (C<sup>N</sup>)</b>                                                 |      |        |      |        |      |        |
| Cu...Cu                                                                                                                                       | 3.39 | (3.33) | 3.40 | (3.33) | 3.41 | (3.33) |
| Cu-O <sub>Ar</sub>                                                                                                                            | 2.05 | (2.02) | 2.05 | (2.02) | 2.05 | (2.02) |
| Cu-N <sub>E-NCS</sub>                                                                                                                         | 1.97 | (1.92) | 1.97 | (1.92) | 1.97 | (1.92) |
| Cu-N <sub>Im</sub>                                                                                                                            | 1.98 | (1.97) | 1.98 | (1.97) | 1.98 | (1.97) |



|                                                                                                                               |      |        |      |        |      |        |
|-------------------------------------------------------------------------------------------------------------------------------|------|--------|------|--------|------|--------|
| Cu-N <sub>Am</sub>                                                                                                            | 2.12 | (2.11) | 2.12 | (2.11) | 2.12 | (2.10) |
| $\chi$                                                                                                                        | 30.3 | (32.5) | 30.8 | (32.6) | 30.9 | (32.6) |
| [Cu <sub>2</sub> ( $\kappa^5$ -L)(NCS) <sub>2</sub> (ClO <sub>4</sub> ) <sub>2</sub> ] <sup>-</sup> ( <b>D<sup>Cl</sup></b> ) |      |        |      |        |      |        |
| Cu···Cu                                                                                                                       | 3.43 | (3.47) | 3.43 | (3.47) | 3.43 | (3.46) |
| Cu-O <sub>Ar</sub>                                                                                                            | 2.06 | (2.02) | 2.06 | (2.02) | 2.07 | (2.02) |
| Cu-N <sub>E-NCS</sub>                                                                                                         | 1.97 | (1.94) | 1.97 | (1.94) | 1.97 | (1.94) |
| Cu-N <sub>Im</sub>                                                                                                            | 1.98 | (1.98) | 1.98 | (1.98) | 1.98 | (1.98) |
| Cu-N <sub>Am</sub>                                                                                                            | 2.12 | (2.12) | 2.12 | (2.12) | 2.12 | (2.12) |
| Cu···O <sub>Cl</sub>                                                                                                          | 3.22 | (2.53) | 3.21 | (2.52) | 3.21 | (2.50) |
|                                                                                                                               | 3.22 | (2.53) | 3.21 | (2.52) | 3.22 | (2.50) |
| $\chi$                                                                                                                        | 31.3 | (41.2) | 31.4 | (41.1) | 31.4 | (41.5) |
| [Cu <sub>2</sub> ( $\kappa^5$ -L)(NCS) <sub>2</sub> ( $\kappa$ N-NCS) <sub>2</sub> ] <sup>-</sup> ( <b>D<sup>N</sup></b> )    |      |        |      |        |      |        |
| Cu···Cu                                                                                                                       | 3.70 | (3.62) | 3.57 | (3.62) | 3.58 | (3.62) |
| Cu-O <sub>Ar</sub>                                                                                                            | 2.10 | (2.05) | 2.08 | (2.05) | 2.09 | (2.05) |
| Cu-N <sub>E-NCS</sub>                                                                                                         | 1.98 | (1.96) | 1.99 | (1.96) | 1.98 | (1.96) |
| Cu-N <sub>Im</sub>                                                                                                            | 1.98 | (2.01) | 2.00 | (2.01) | 2.00 | (2.02) |
| Cu-N <sub>Am</sub>                                                                                                            | 2.13 | (2.16) | 2.14 | (2.16) | 2.13 | (2.16) |
| Cu-N <sub>A-NCS</sub>                                                                                                         | 2.40 | (2.22) | 2.42 | (2.21) | 2.42 | (2.21) |
| $\chi$                                                                                                                        | 42.0 | (46.9) | 39.0 | (46.8) | 39.1 | (46.9) |
| [Cu <sub>2</sub> ( $\kappa^5$ -L)(NCS) <sub>2</sub> ( $\kappa$ S-SCN) <sub>2</sub> ] <sup>-</sup> ( <b>D<sup>S</sup></b> )    |      |        |      |        |      |        |
| Cu···Cu                                                                                                                       | 3.47 | (3.65) | 3.43 | (3.65) | 3.44 | (3.69) |
| Cu-O <sub>Ar</sub>                                                                                                            | 2.06 | (2.07) | 2.06 | (2.07) | 2.07 | (2.08) |
| Cu-N <sub>E-NCS</sub>                                                                                                         | 1.96 | (1.94) | 1.97 | (1.94) | 1.97 | (1.94) |
| Cu-N <sub>Im</sub>                                                                                                            | 1.98 | (1.99) | 1.98 | (1.99) | 1.98 | (1.99) |
| Cu-N <sub>Am</sub>                                                                                                            | 2.15 | (2.18) | 2.12 | (2.18) | 2.12 | (2.18) |
| Cu···S <sub>A-NCS</sub>                                                                                                       | 3.55 | (2.69) | 4.59 | (2.68) | 4.58 | (2.65) |
| $\chi$                                                                                                                        | 32.3 | (45.8) | 31.3 | (45.8) | 31.3 | (46.6) |

Atomic names: O<sub>Ar</sub>, N<sub>Im</sub> and N<sub>Am</sub> are donor atoms from the phenolic oxigens, iminic and aminic nitrogens of the ligand; OH (or O<sub>OH</sub> especificating a lone pair on the oxygen) and N<sub>3</sub> represent the donor atom in the bridging ligand in edge-sharing unit; N<sub>Im</sub> and N<sub>Am</sub> are donor atoms from the phenolic oxigens, iminic and aminic nitrogens of the ligand; O<sub>Cl</sub> and O<sub>W</sub> are the oxigen atoms of perchlorate and water; N<sub>E-NCS</sub> is the nitrogen of equatorial thiocyanate; and, N/S<sub>A-NCS</sub> represent the corresponding donor of apical thiocyanate.

Angular parameters:  $\theta$  is defined as the bent angle between CuO<sub>2</sub> (or CuON) planes in the Cu<sub>2</sub>O<sub>2</sub> (or Cu<sub>2</sub>ON) ring;  $\chi$  is defined as the tilt angle between Cu plane and chelate ligand.

**Table S7.** Structural motifs of perchlorate anion bound to edge-sharing binuclear copper(II) having phenoxo and hydroxo bridges and four terminal nitrogen donors.

a) Perchlorate anion is bound to both copper atoms into binuclear unit

| Refcode     | Type      | Cu <sub>A</sub> ···O <sub>Cl</sub> | Cu <sub>B</sub> ···O <sub>Cl</sub> | O <sub>H</sub> ···O <sub>Cl</sub> |
|-------------|-----------|------------------------------------|------------------------------------|-----------------------------------|
| IQOLAB ‡    | <b>I</b>  | 2.554                              | 3.324                              | 3.041                             |
| ZOJSOG *    | <b>I</b>  | 3.139                              | 3.197                              | 2.948                             |
| PEVBOI \$,‡ | <b>I</b>  | 3.736                              | 3.822                              | 2.959                             |
| DOYGON      | <b>II</b> | 2.450                              | 2.586                              |                                   |
| PEVBOI \$   | <b>II</b> | 2.464                              | 2.610                              |                                   |
| LAJTIZ §    | <b>II</b> | 2.467                              | 3.222                              |                                   |
| SICDUD \$   | <b>II</b> | 2.481                              | 2.597                              |                                   |
| OBOWOS \$,§ | <b>II</b> | 2.499                              | 2.528                              |                                   |
| FAMJUY *    | <b>II</b> | 2.506                              | 2.788                              |                                   |
| HAGLAF §    | <b>II</b> | 2.526                              | 2.603                              |                                   |
| GUQKOS ‡    | <b>II</b> | 2.534                              | 2.587                              |                                   |
| GIRQAZ      | <b>II</b> | 2.536                              | 2.923                              |                                   |
| ZOJSOG *    | <b>II</b> | 2.543                              | 2.661                              |                                   |
| KENYOR \$,‡ | <b>II</b> | 2.561                              | 2.999                              |                                   |
| SEKVEK *    | <b>II</b> | 2.568                              | 2.621                              |                                   |
| GIRQAZ      | <b>II</b> | 2.579                              | 2.832                              |                                   |
| FAXDIR *    | <b>II</b> | 2.613                              | 2.653                              |                                   |
| VERMAI *    | <b>II</b> | 2.645                              | 2.805                              |                                   |
| SEKVEK *    | <b>II</b> | 2.657                              | 2.664                              |                                   |
| CANTET *    | <b>II</b> | 2.685                              | 2.822                              |                                   |
| FAMJUY *    | <b>II</b> | 2.692                              | 3.066                              |                                   |
| CANTET *    | <b>II</b> | 2.720                              | 3.070                              |                                   |
| FAXDIR *    | <b>II</b> | 2.773                              | 2.940                              |                                   |
| POVVUR \$,§ | <b>II</b> | 2.859                              | 3.118                              |                                   |
| VERMAI *    | <b>II</b> | 2.939                              | 3.033                              |                                   |

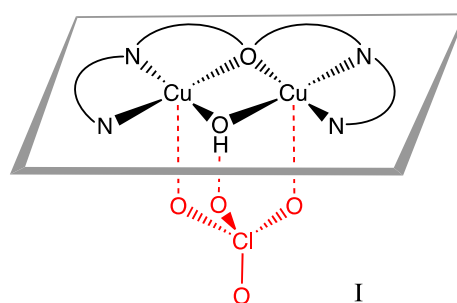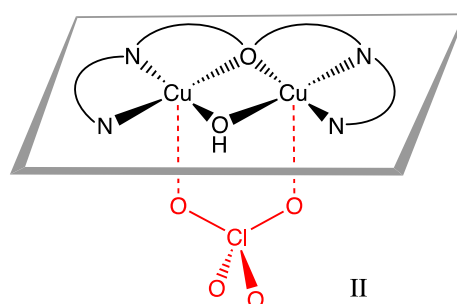

\* Two perchlorates are coordinated to the same binuclear unit as a bridging ligand;

§ Two perchlorates are non-equivalent bound; § Some copper atom is coordinated by water (or alcohol) molecule; ‡ An important disorder in

found for the perchlorate anion.

b) Perchlorate anion is bound to only one copper atom into binuclear unit

| Refcode      | Type       | Cu...O <sub>Cl</sub> | O <sub>H</sub> ...O <sub>Cl</sub> |
|--------------|------------|----------------------|-----------------------------------|
| DADJAT §     | <b>III</b> | 2.543                | 2.898                             |
| LAJTIZ §     | <b>III</b> | 3.619                | 2.958                             |
| IQOLAB ‡     | <b>IV</b>  | 2.402                |                                   |
| SIRLEK §,‡   | <b>IV</b>  | 2.528                |                                   |
| KENYOR §     | <b>IV</b>  | 2.598                |                                   |
| POVVUR §,§,‡ | <b>IV</b>  | 2.627                |                                   |
| SICDUD §     | <b>IV</b>  | 2.716                |                                   |
| OBOWOS §,§   | <b>IV</b>  | 2.838                |                                   |
| SAVMEH §     | <b>IV</b>  | 2.990                |                                   |
| DIJBAA §     | <b>IV</b>  | 3.212                |                                   |
| DADJAT §     | <b>IV</b>  | 3.256                |                                   |
| GETYOT       | <b>IV</b>  | 3.455                |                                   |
| GETYOT       | <b>IV</b>  | 3.731                |                                   |
| COSKAW       | <b>V</b>   | 3.532                |                                   |
| CEKRIV §     | <b>VI</b>  | 2.388                |                                   |
| POKDID       | <b>VI</b>  | 2.449                |                                   |
|              |            | 2.673                |                                   |
| UZUXET §,‡   | <b>VI</b>  | 2.536                |                                   |
|              |            | 2.682                |                                   |
| DUDFUD §     | <b>VI</b>  | 2.644                |                                   |
|              |            | 2.712                |                                   |
| GIRQAZ       | <b>VI</b>  | 2.723                |                                   |
| GIRQAZ       | <b>VI</b>  | 2.730                |                                   |

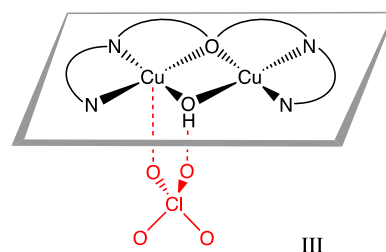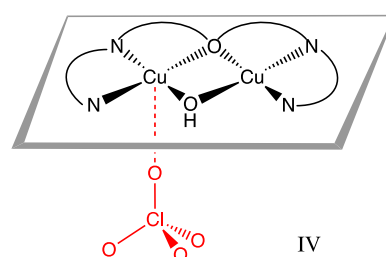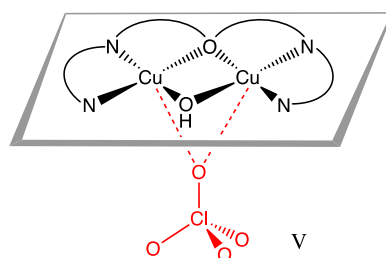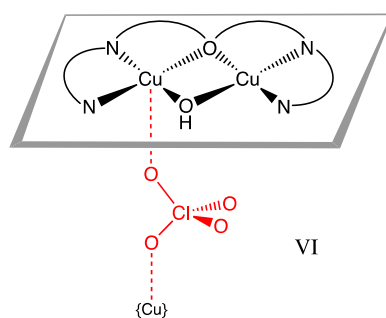

§ Two perchlorates are non-equivalent bound; § Some copper atom is coordinated by water (or alcohol) molecule;  
‡ An important disorder is found for the perchlorate anion.

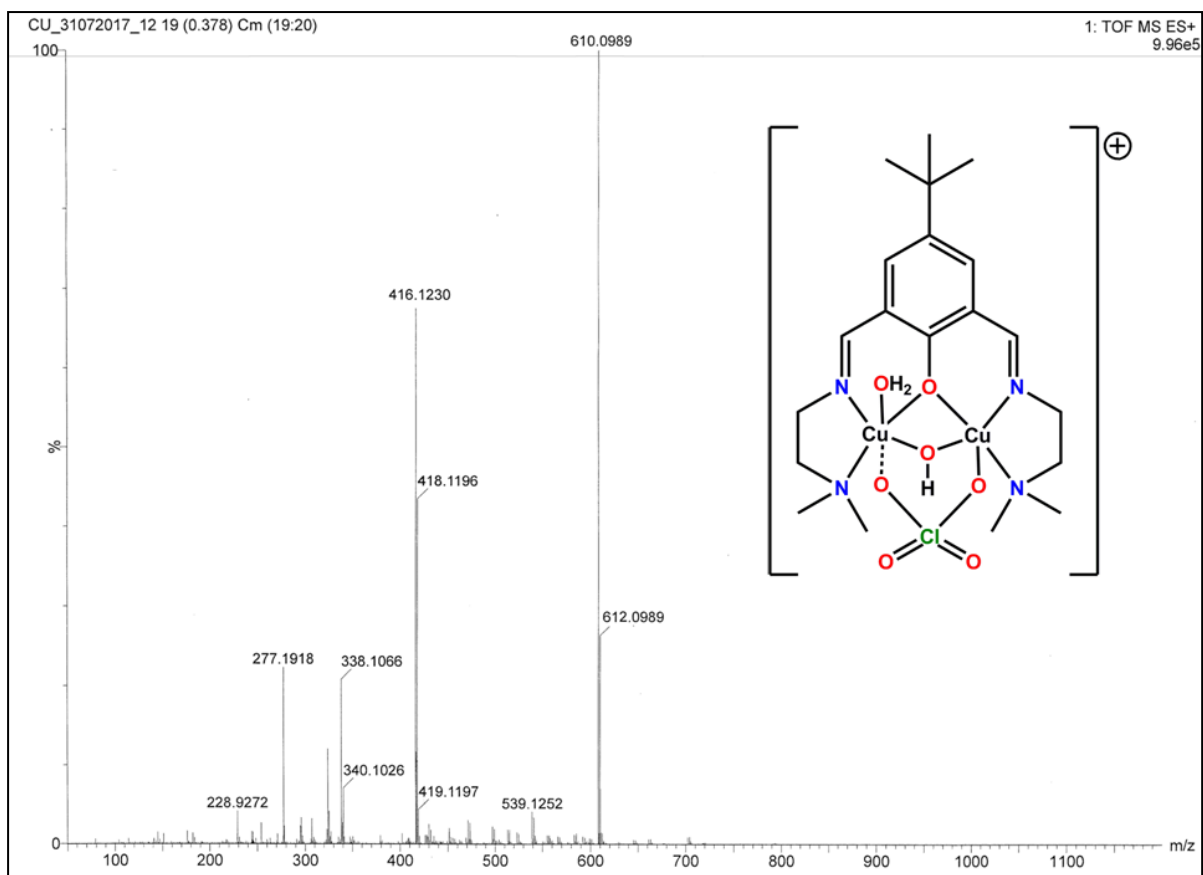

**Fig. S3** ESI-MS spectrum of complex **1**

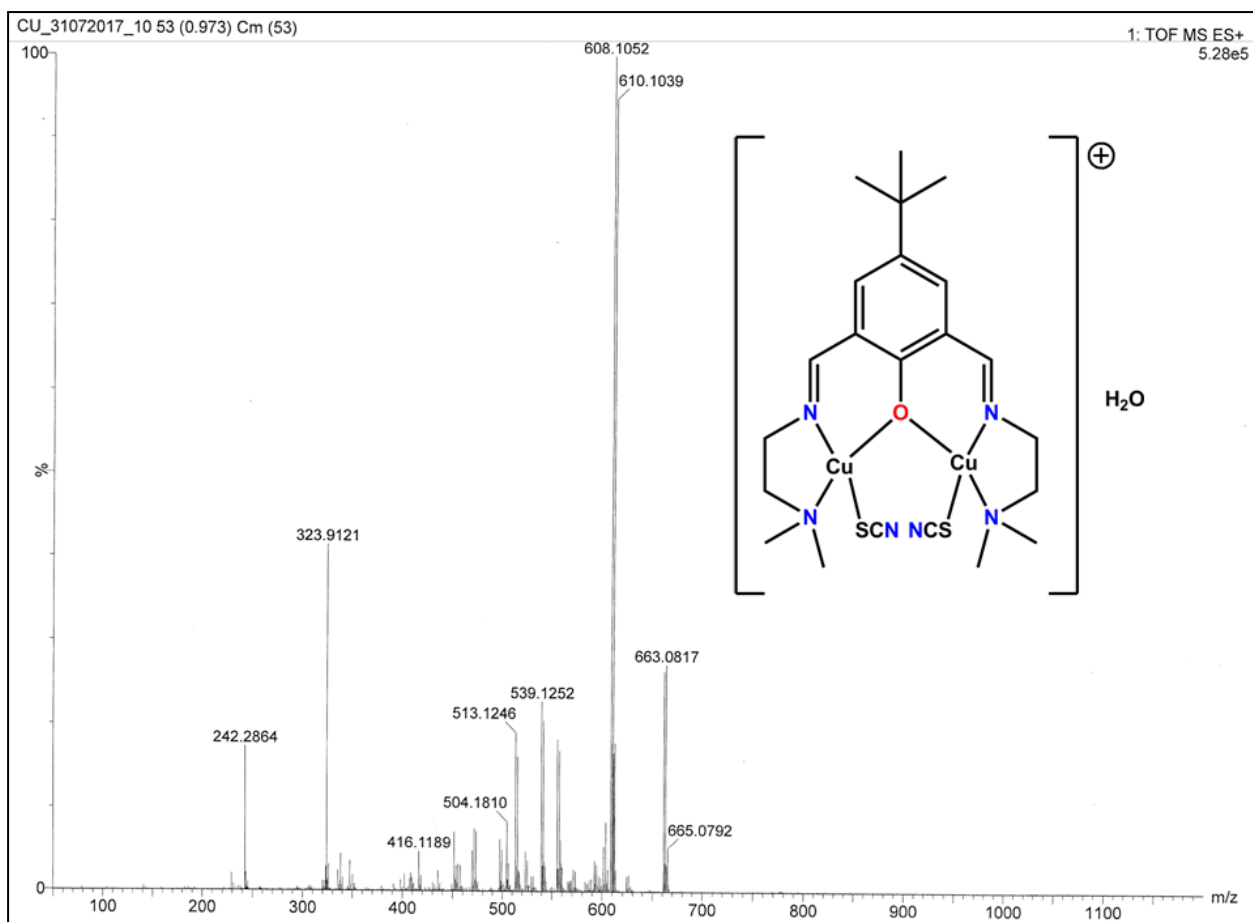

**Fig. S4** ESI-MS spectrum of complex **2**

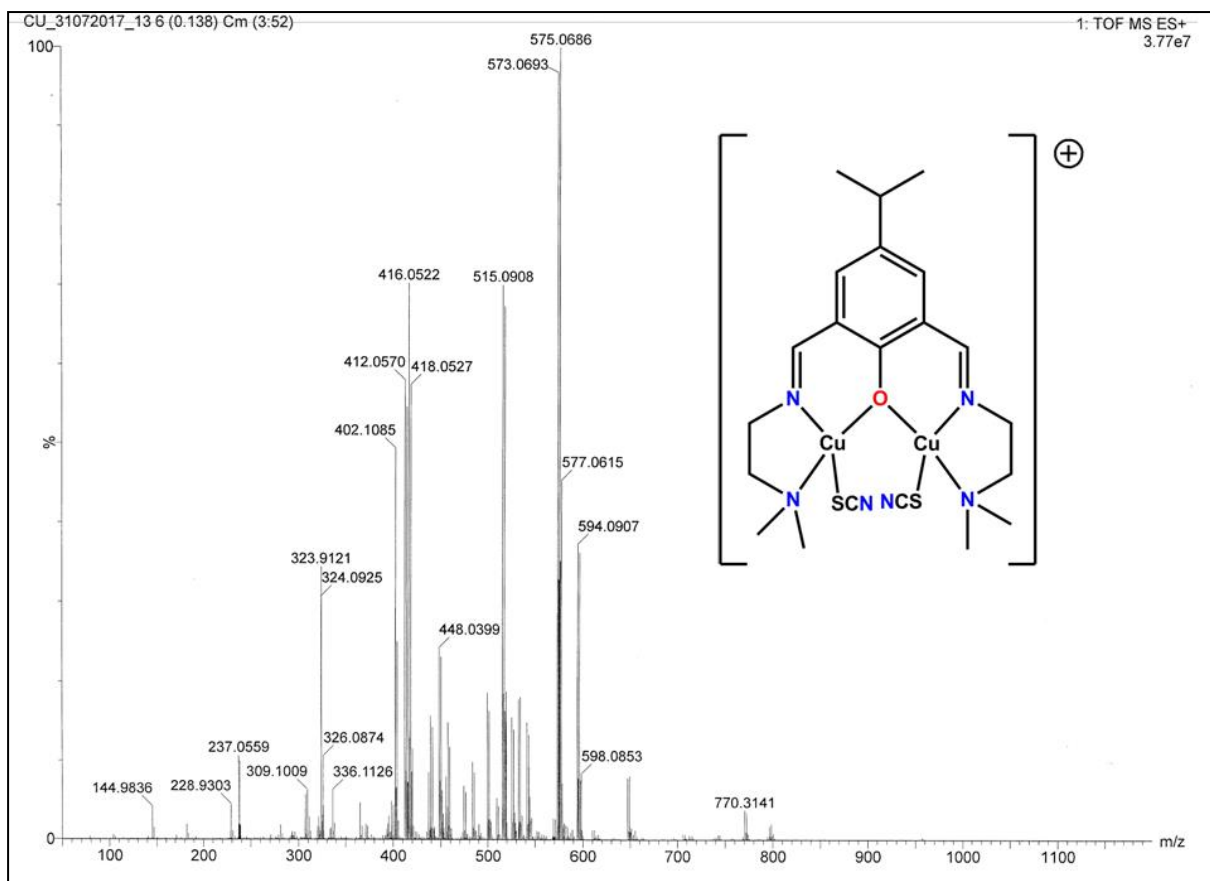

**Fig. S5** ESI-MS spectrum of complex **3**

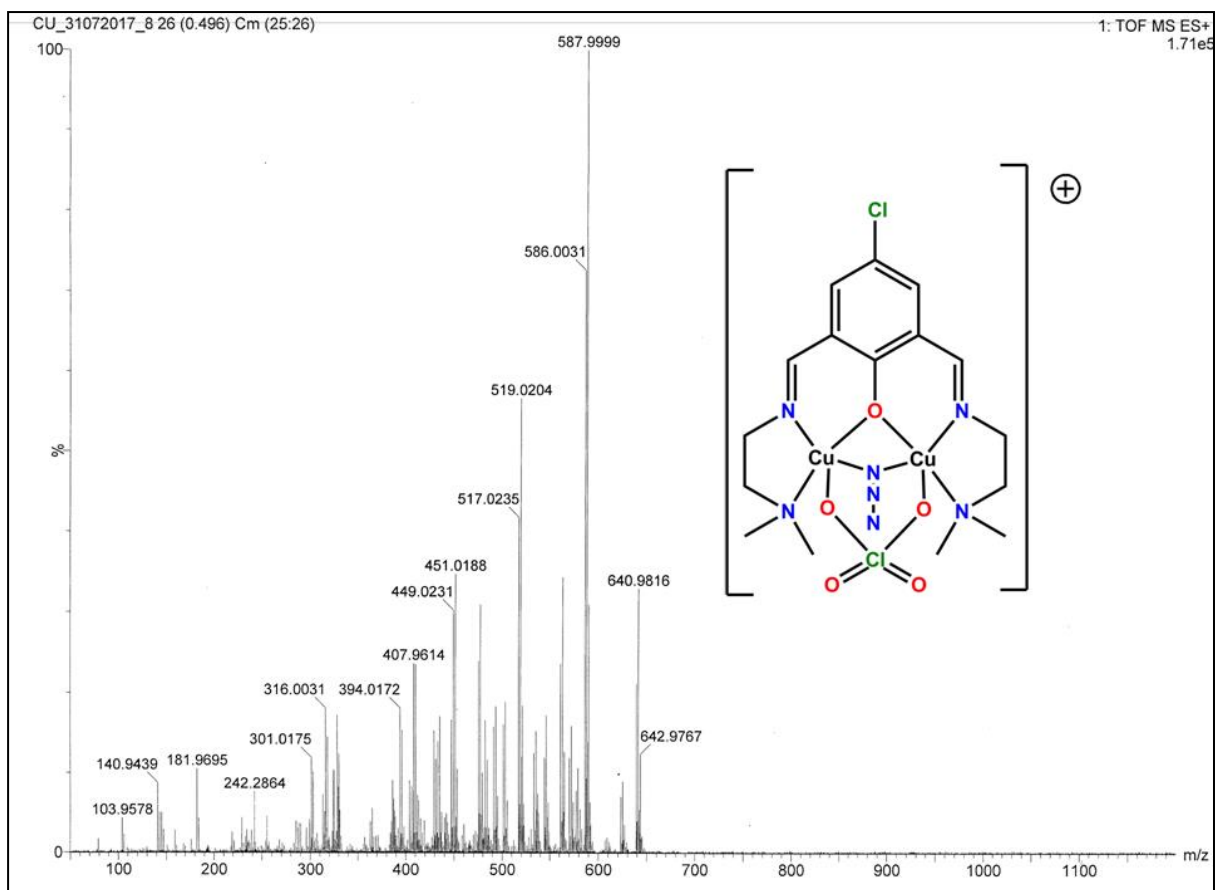

**Fig. S6** ESI-MS spectrum of complex **4**

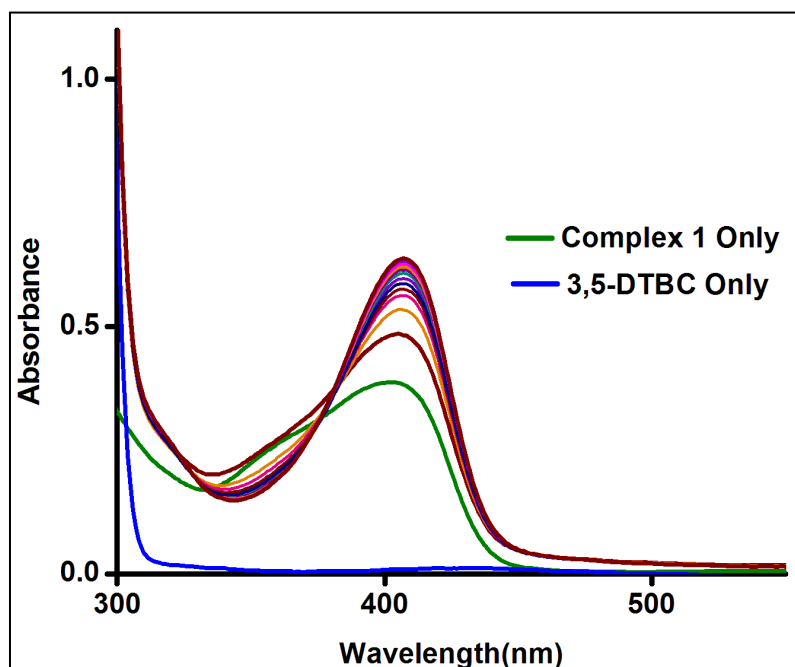

**Fig. S7** Oxidation of 3,5-DTBC by complex **1** (substrate: catalyst = 100:1) in DMSO observed by UV-Vis spectroscopy with time at 25 °C at intervals of 5 min.

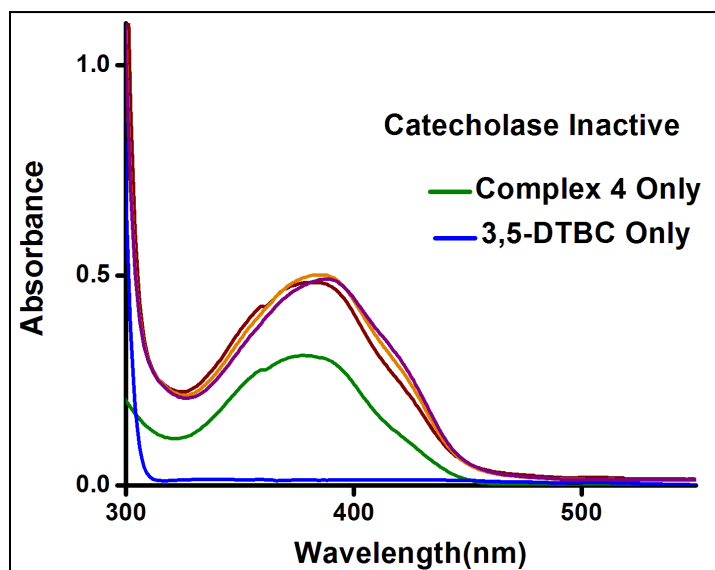

**Fig. S8** Oxidation of 3,5-DTBC by complex 4 (substrate: catalyst = 100:1) in DMSO observed by UV-Vis spectroscopy with time at 25 °C .

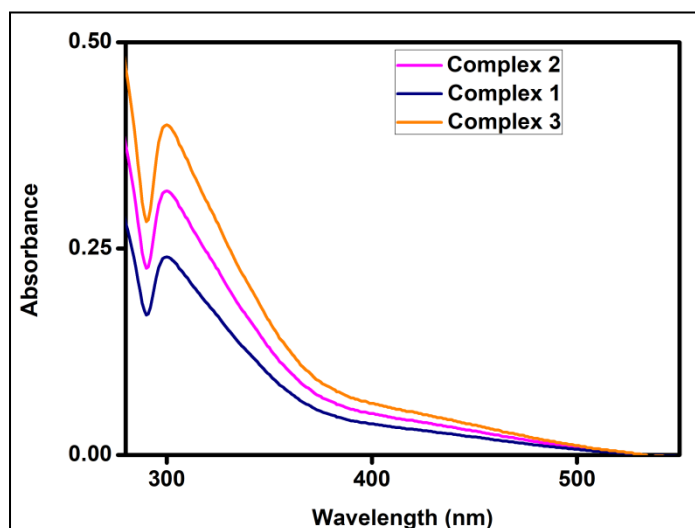

**Fig. S9** UV-Vis Spectral scan for determination of  $I_3^-$  as a consequence of hydrogen peroxide formation.



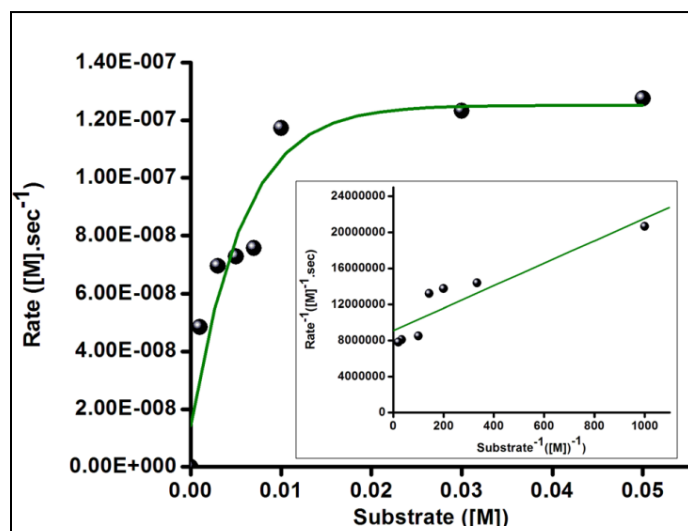

**Fig. S10** Lineweaver-Burk plot of complex **1** (Inset shows Plot of enzymatic kinetics for complex **1**) for catecholase activity.

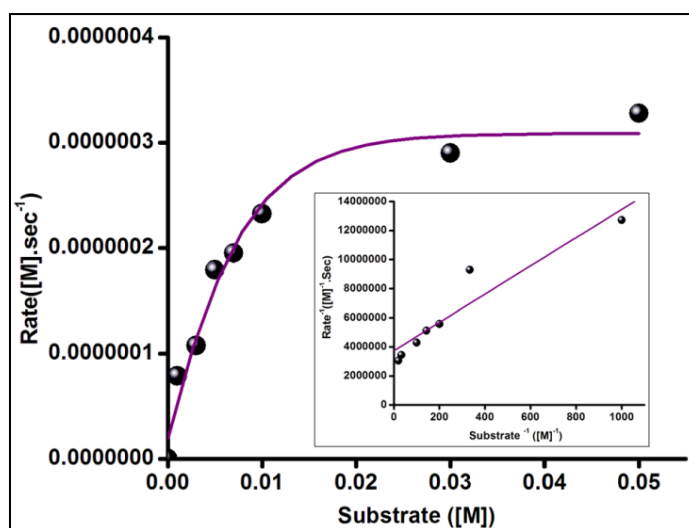

**Fig. S11** Lineweaver-Burk plot of complex **2** (Inset shows Plot of enzymatic kinetics for complex **2**) for catecholase activity.

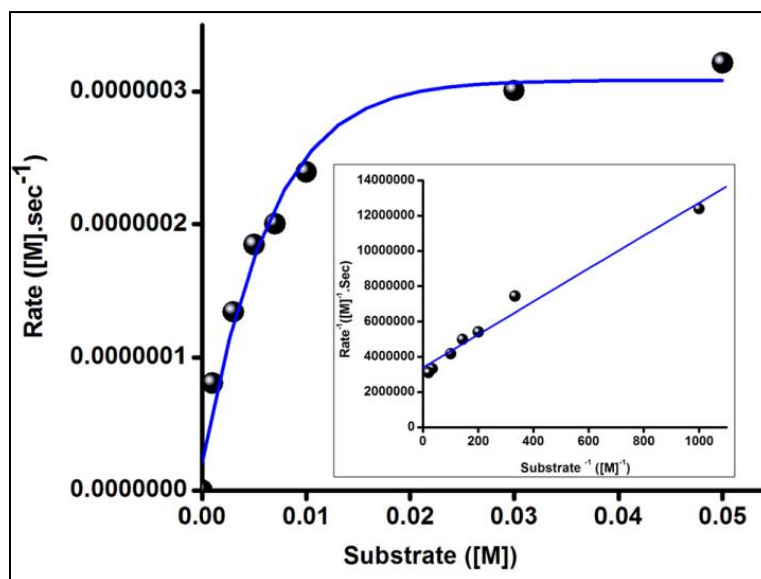

**Fig. S12** Lineweaver-Burk plot of complex **3** (Inset shows Plot of enzymatic kinetics for complex **3**) for catecholase activity.
